# Supplementary material
Source: PubMed Central journal article supplement (PMC11074775)
Supplement: NIHMS1984593-supplement-supplemental_material.pdf [file NIHMS1984593-supplement-supplemental_material.pdf]

**Title**

***A prospective cohort study identifies two types of HIV+ Kaposi Sarcoma (KS) lesions: proliferative and inflammatory.***

Razia Moorad, Edwards Kasonkanji, Joe Gumulira, Yolanda Gondwe, Morgan Dewey, Yue Pan, Alice Peng, Linda J. Pluta, Evaristar Kudowa, Richard Nyasosela, Tamiwe Tomoka, Hannock Tweya, Tom Heller, Salem Gugsu, Sam Phiri, Dominic T Moore, Blossom Damania, Matthew Painschab, Mina C. Hosseinipour, and Dirk P. Dittmer

**Table of contents:**

**Supplementary Figure 1**

**Supplementary Figure 2**

**Supplementary table 1**

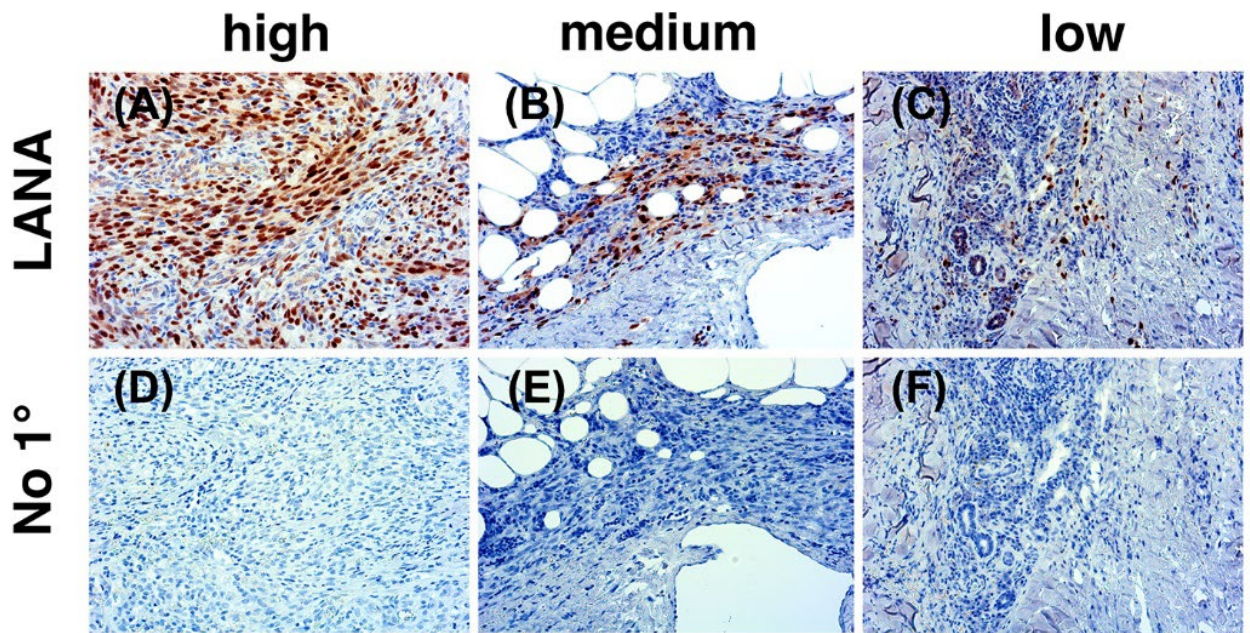

**Supplementary Figure 1:**

Visual gradings of LANA stains on FFPE KS skin biopsy sections. A biopsy staining negative for KSHV LANA was considered one of the study's exclusion criteria. Representative images of **(A)** high, **(B)** medium, and **(C)** low LANA counts. **(D-F)** Control sections for each sample. (x200 magnification). Repeat staining was conducted at UNC Chapel Hill.

**(A)**

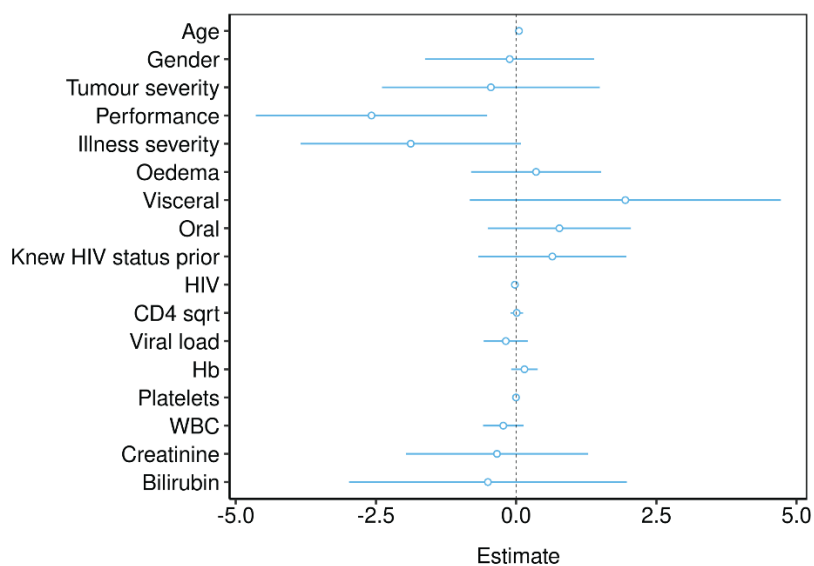

**(B)**

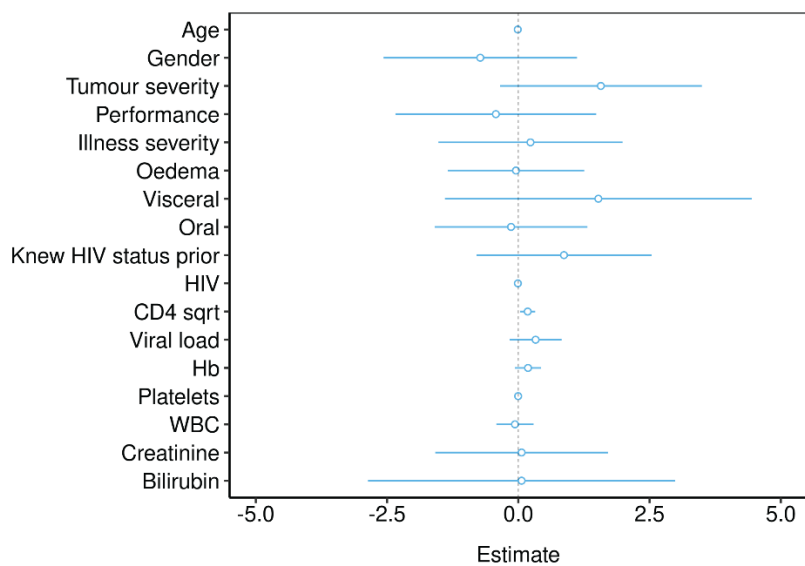

**Supplementary Figure 2:**

Logistic regression analysis to determine the effect of clinical associations on response. **(A)**

Participants with a higher than 70% Karnofsky performance status were less likely to achieve CR at 48 weeks ( $p \leq 0.014$ ). **(B)** Merging complete and partial responses revealed that a higher square root of the CD4 count is associated with achieving complete or partial response at 48 weeks.

**Supplementary Table 1:**

RNA sequencing. Sequencing coverage and quality statistics. <sup>a</sup> Sequencing reads were aligned to reference GRCh37. <sup>b</sup> Total RNA sequencing was performed using Ion AmpliSeq Transcriptome Human (cat# A31446, A29034) technology. Therefore virtually no reads mapped to the rRNA region (Ratio <  $1:10^5$  for all)

<sup>c</sup> Samples with a minimum count of 10 unique gene reads were retained for further analysis.

| Sample ID | Total number of sequenced reads | Total number of uniquely mapped reads <sup>a</sup> | RNA integrity number (RIN) | Ratio of all reads aligned to rRNA regions to total uniquely mapped reads (rRNA rate) <sup>b</sup> * $10^{-6}$ | Ratio of exon-mapped reads to total uniquely mapped reads (Expression Profile Efficiency) <sup>b</sup> | Total number of detected transcripts with reads $\geq 10^c$ |
|-----------|---------------------------------|----------------------------------------------------|----------------------------|----------------------------------------------------------------------------------------------------------------|--------------------------------------------------------------------------------------------------------|-------------------------------------------------------------|
| KSP002    | 2773382                         | 2386045                                            | 8.3                        | 2.1                                                                                                            | 0.95                                                                                                   | 16743                                                       |
| KSP008    | 2502038                         | 2133359                                            | 7.6                        | 4.2                                                                                                            | 0.95                                                                                                   | 16660                                                       |
| KSP009    | 1698935                         | 1414124                                            | 8.9                        | 0.71                                                                                                           | 0.96                                                                                                   | 15618                                                       |
| KSP012    | 2287555                         | 1980774                                            | 8.5                        | 0                                                                                                              | 0.94                                                                                                   | 15978                                                       |
| KSP013    | 2811851                         | 2457531                                            | 7.1                        | 2.6                                                                                                            | 0.93                                                                                                   | 17830                                                       |
| KSP014    | 2690121                         | 2320915                                            | 8.4                        | 3.0                                                                                                            | 0.94                                                                                                   | 17385                                                       |
| KSP031    | 1902350                         | 1230902                                            | NA                         | 0                                                                                                              | 0.99                                                                                                   | 15241                                                       |
| KSP033    | 1473368                         | 942416                                             | NA                         | 0                                                                                                              | 0.99                                                                                                   | 14669                                                       |
| KSP035    | 1674219                         | 1102658                                            | NA                         | 0                                                                                                              | 0.99                                                                                                   | 14892                                                       |
| KSP037    | 7469070                         | 4499699                                            | NA                         | 0                                                                                                              | 0.98                                                                                                   | 17656                                                       |
| KSP038    | 2737461                         | 1714805                                            | NA                         | 0                                                                                                              | 0.99                                                                                                   | 16272                                                       |
| KSP044    | 658861                          | 515923                                             | NA                         | 0                                                                                                              | 0.84                                                                                                   | 17720                                                       |
| KSP048    | 2453190                         | 2113111                                            | 7.3                        | 0.95                                                                                                           | 0.92                                                                                                   | 17651                                                       |
| KSP049    | 2602543                         | 2238117                                            | 8.5                        | 1.8                                                                                                            | 0.96                                                                                                   | 16876                                                       |
| KSP050    | 2963162                         | 2479666                                            | 7.7                        | 1.6                                                                                                            | 0.90                                                                                                   | 18293                                                       |
| KSP052    | 4302088                         | 2617940                                            | NA                         | 0                                                                                                              | 0.97                                                                                                   | 16981                                                       |
| KSP053    | 4997180                         | 4130361                                            | 8.1                        | 1.9                                                                                                            | 0.97                                                                                                   | 17130                                                       |
| KSP054    | 3960210                         | 2961796                                            | NA                         | 2.0                                                                                                            | 0.96                                                                                                   | 17179                                                       |
| KSP058    | 2719067                         | 2343165                                            | 6.9                        | 2.6                                                                                                            | 0.93                                                                                                   | 17407                                                       |
| KSP061    | 2214909                         | 1888369                                            | 7.4                        | 2.7                                                                                                            | 0.92                                                                                                   | 17514                                                       |
| KSP062    | 3106270                         | 2654164                                            | 8.1                        | 2.6                                                                                                            | 0.94                                                                                                   | 17750                                                       |
| KSP063    | 1986805                         | 1637689                                            | 7.8                        | 5.5                                                                                                            | 0.95                                                                                                   | 16180                                                       |
| KSP064    | 3896012                         | 3455347                                            | 8.6                        | 0.87                                                                                                           | 0.95                                                                                                   | 17582                                                       |
| KSP065    | 3402897                         | 2769457                                            | 7.9                        | 1.4                                                                                                            | 0.97                                                                                                   | 16578                                                       |
| KSP066    | 6313902                         | 5313934                                            | 7.5                        | 1.1                                                                                                            | 0.95                                                                                                   | 18702                                                       |
| KSP069    | 2403135                         | 2109687                                            | 8.0                        | 3.8                                                                                                            | 0.94                                                                                                   | 16874                                                       |
| KSP072    | 3053643                         | 2610784                                            | 7.7                        | 1.5                                                                                                            | 0.94                                                                                                   | 18177                                                       |
| KSP074    | 5240050                         | 4552084                                            | 7.4                        | 3.7                                                                                                            | 0.94                                                                                                   | 20178                                                       |

|        |         |         |     |         |      |       |
|--------|---------|---------|-----|---------|------|-------|
| KSP074 | 5340763 | 4654138 | 7.6 | 3.7     | 0.94 | 20178 |
| KSP076 | 4526002 | 3889252 | 7.9 | 1.5     | 0.93 | 18173 |
| KSP077 | 2362498 | 2006173 | 8.1 | 0.50    | 0.94 | 17150 |
| KSP078 | 3232398 | 2690698 | 8.4 | 3.0     | 0.95 | 17454 |
| KSP079 | 4009473 | 3389732 | 8.2 | 0.30    | 0.95 | 17108 |
| KSP080 | 2619148 | 2247993 | 7.5 | 1.3     | 0.95 | 17291 |
| KSP081 | 3240772 | 2801832 | 8.8 | 2.1     | 0.95 | 17786 |
| KSP082 | 3129902 | 2656720 | 7.8 | 1.5     | 0.95 | 18706 |
| KSP083 | 3189330 | 2716750 | 7.9 | 1.1     | 0.95 | 17236 |
| KSP084 | 2511673 | 2229453 | 8.6 | 6.7     | 0.77 | 17724 |
| KSP085 | 2921463 | 2471020 | 7.7 | 2.8     | 0.95 | 16690 |
| KSP087 | 3996995 | 3524483 | 7.5 | 13      | 0.87 | 17187 |
| KSP088 | 3268844 | 2767671 | 5.1 | 3.2     | 0.86 | 20800 |
| KSP089 | 3554587 | 2883588 | 6.0 | 2.1     | 0.93 | 19233 |
| KSP090 | 3597470 | 3145782 | 7.2 | 0       | 0.96 | 17789 |
| KSP091 | 2463992 | 2126017 | 8.4 | 1.4     | 0.95 | 16370 |
| KSP092 | 3056520 | 2650824 | 7.4 | 1.1     | 0.89 | 19248 |
| KSP093 | 2590953 | 2243376 | 7.9 | 2.2     | 0.95 | 16653 |
| KSP094 | 2782391 | 2430104 | 7.7 | 1.2     | 0.95 | 17593 |
| KSP095 | 2679416 | 2310849 | 8.0 | 0.43    | 0.94 | 17394 |
| KSP096 | 2859415 | 2500430 | 7.1 | 4.8     | 0.94 | 17868 |
| KSP100 | 2537880 | 2226025 | 7.0 | 0.90    | 0.95 | 17223 |
| KSP102 | 2438178 | 2047764 | 8.6 | 0.98    | 0.96 | 16295 |
| KSP104 | 2737244 | 2279075 | 8.7 | 2.6     | 0.96 | 15648 |
| KSP105 | 3088600 | 2653938 | 8.3 | 1.5     | 0.95 | 16886 |
| KSP106 | 3034385 | 2624287 | 8.5 | 1.1     | 0.95 | 17052 |
| KSP107 | 3647261 | 3147884 | 7.1 | 0.95    | 0.93 | 19217 |
| KSP108 | 3204764 | 2741688 | 8.5 | 3.6E-06 | 0.96 | 16201 |
| KSP112 | 3711898 | 3168553 | 7.3 | 3.2E-06 | 0.94 | 17576 |
| KSP113 | 2841002 | 2411886 | 8.2 | 8.3E-07 | 0.94 | 17058 |
| KSP114 | 3082095 | 2655299 | 8.1 | 2.3E-06 | 0.93 | 18323 |
| KSP115 | 2821969 | 2394691 | 7.8 | 2.1E-06 | 0.93 | 17835 |

|        |          |         |     |         |      |       |
|--------|----------|---------|-----|---------|------|-------|
| KSP116 | 3609992  | 3120769 | 8.0 | 2.0E-06 | 0.94 | 18704 |
| KSP117 | 3236218  | 2651100 | 8.0 | 1.5E-06 | 0.94 | 17103 |
| KSP118 | 3339528  | 2822258 | 7.9 | 1.1E-06 | 0.94 | 18360 |
| KSP119 | 2652268  | 2318389 | 8.3 | 8.6E-07 | 0.95 | 18016 |
| KSP119 | 2660343  | 2251158 | 7.8 | 8.9E-07 | 0.95 | 18016 |
| KSP121 | 2984651  | 2559526 | 7.9 | 1.6E-06 | 0.95 | 16950 |
| KSP124 | 3139954  | 2735055 | 7.8 | 1.1E-06 | 0.94 | 17777 |
| KSP125 | 2715835  | 2356963 | 7.4 | 1.7E-06 | 0.96 | 16896 |
| KSP127 | 10565248 | 6811131 | 7.8 | 0       | 0.99 | 18550 |
| KSP128 | 2914731  | 2547687 | 7.0 | 1.2E-06 | 0.96 | 16815 |
| KSP129 | 2619553  | 2263276 | 8.1 | 1.3E-06 | 0.96 | 16893 |
| KSP141 | 2938185  | 2566500 | 7.5 | 0       | 0.95 | 17135 |
| KSP142 | 3068452  | 2634300 | 7.0 | 3.0E-06 | 0.94 | 17968 |
| KSP144 | 12484070 | 7343013 | NA  | 0       | 0.98 | 18165 |
| KSP145 | 8031152  | 4931399 | 6.4 | 2.0E-07 | 0.99 | 17301 |
| KSP148 | 3789784  | 2644493 | 8.3 | 1.1E-06 | 0.98 | 15338 |
| KSP150 | 5387841  | 4720589 | 8.7 | 1.9E-06 | 0.92 | 18280 |
| KSP151 | 3804617  | 3186523 | 8.3 | 1.9E-06 | 0.96 | 17091 |
| KSP152 | 4849635  | 4220555 | 8.2 | 7.1E-07 | 0.96 | 18510 |
| KSP153 | 5100826  | 4491190 | 7.8 | 2.5E-06 | 0.96 | 18899 |
